# Table of Contents

## FEATURES

**Approaches to Biology Teaching and Learning: On Integrating Pedagogical Training into the Graduate Experiences of Future Science Faculty**  
 Kimberly Tanner and Deborah Allen .....1–6

**WWW: The Scientific Method**  
 Robert V. Blystone and Kevin Blodgett .....7–11

**Education at the National Academies: Three Recent Reports on Improving Science Education**  
 Jay B. Labov .....12–18

**Meeting Report: Teaching Signal Transduction**  
 IJsbrand Kramer and Geraint Thomas .....19–26

## ESSAYS

**FIRST—What’s Next?**  
 Diane Ebert-May and Everett Weber .....27–28

**High School Biology Today: What the Committee of Ten Did Not Anticipate**  
 José Vázquez .....29–33

**Criticism and Interpretation: Teaching the Persuasive Aspects of Research Articles**  
 Christopher M. Gillen .....34–38

## REVIEW

**Book Review: Moving from Medieval Apprenticeships to Reflective Practice—Review of: *Entering Mentoring: A Seminar to Train a New Generation of Scientists*, by J. Handelsman, C. Pfund, S. Miller Lauffer, and C. Pribbenow; 2005**  
 Reviewed by Keith Garbutt .....39–40

## ARTICLES

**A Small-Scale Concept-based Laboratory Component: The Best of Both Worlds**  
 Dina Gould Halme, Julia Khodor, Rudolph Mitchell, and Graham C. Walker .....41–51

**Incorporating a New Bioinformatics Component into Genetics at a Historically Black College: Outcomes and Lessons**  
 J. David Holtzclaw, Arri Eisen, Erika M. Whitney, Meera Penumetcha, J. Joseph Hoey, and K. Sean Kimbro ...52–64

**Student Perspectives on Curricular Change: Lessons from an Undergraduate Lower-Division Biology Core**  
 Merri Lynn Casem .....65–75

**General Chemistry: Expanding the Learning Outcomes and Promoting Interdisciplinary Connections through the Use of a Semester-long Project**  
 Thomas J. Wenzel .....76–84

### *On the Cover*

Graduate students in the life sciences headed for careers that require teaching skills need more pedagogical training and experience than many graduate programs provide (see the feature by Tanner and Allen, p. 1). A few departments have excellent training mechanisms in place. On the cover, Zakee Sabree (left), a graduate student in Microbiology at the University of Wisconsin, Madison, discusses research results with undergraduate Andra Gaarder in an HHMI-supported mentor training program directed by Jo Handelsman (photo by Sarah Miller Lauffer). For more on this program, see the review of *Entering Mentoring* by Keith Garbutt on p. 39.

*A goal of CBE is to stimulate dialogue; therefore, readers are invited to submit comments on these articles to [cbe@ascb.org](mailto:cbe@ascb.org).*
